# Supplementary material
Source: PubMed Central journal article supplement (PMC4879106)

**Supplemental Figure 2.** Electrode groupings. Frontal electrodes were used for analysis of N1, Pb, and Nc.

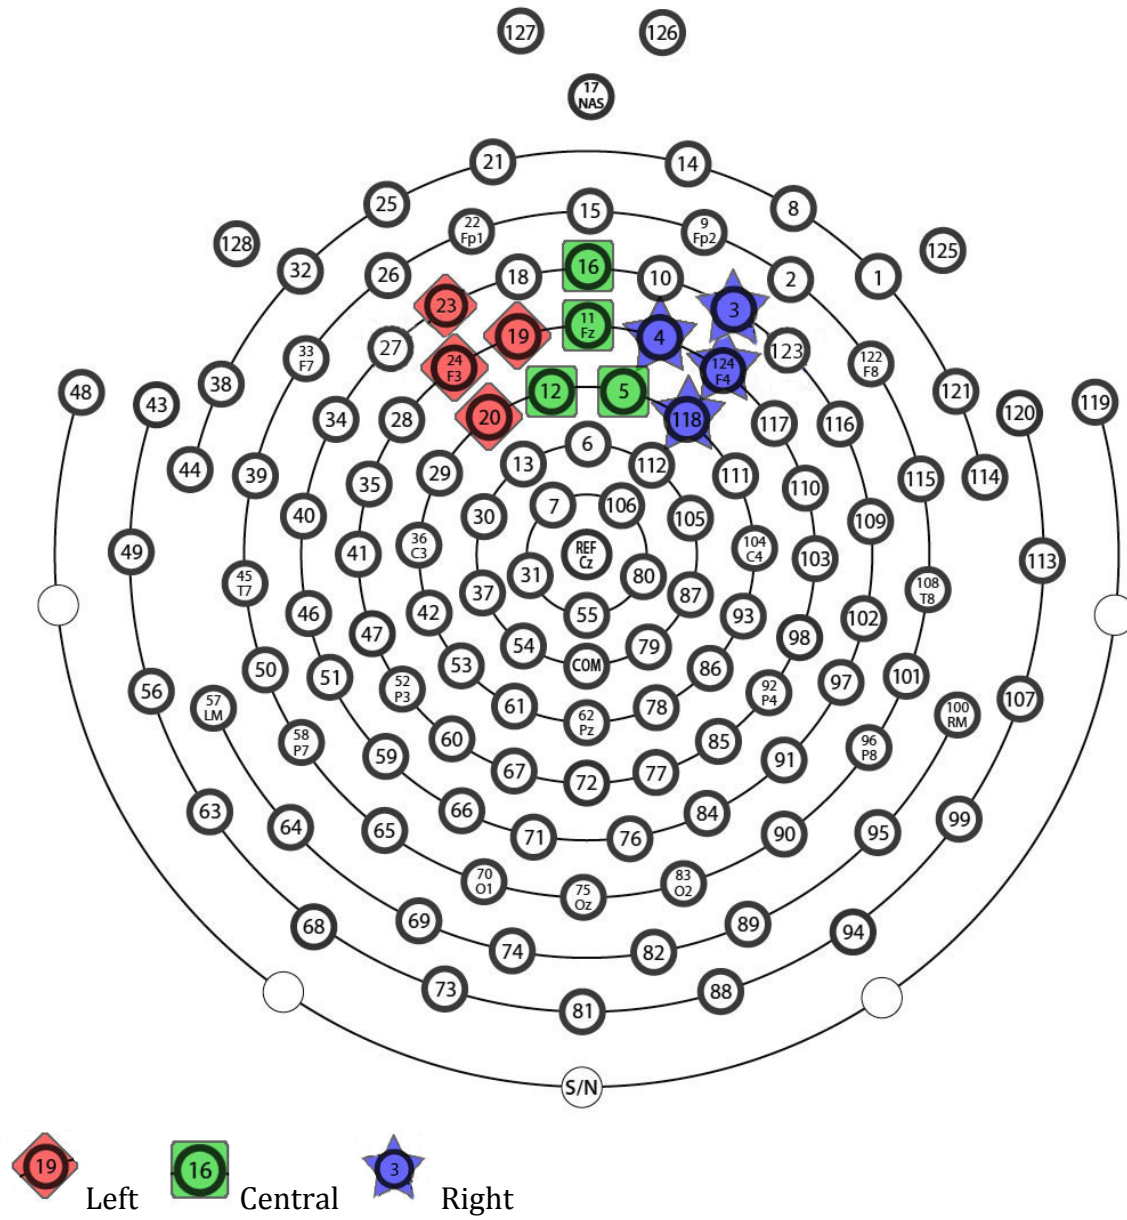

Supplement: NIHMS782757-supplement-Supp_2.pdf [file NIHMS782757-supplement-Supp_2.pdf]
