# Supplementary material
Source: PubMed Central journal article supplement (PMC4879106)
Supplement: NIHMS782757-supplement-Supp_3.pdf [file NIHMS782757-supplement-Supp_3.pdf]

**Supplemental Figure 3.** Scalp Topographic Map: Nc Mean Amplitude

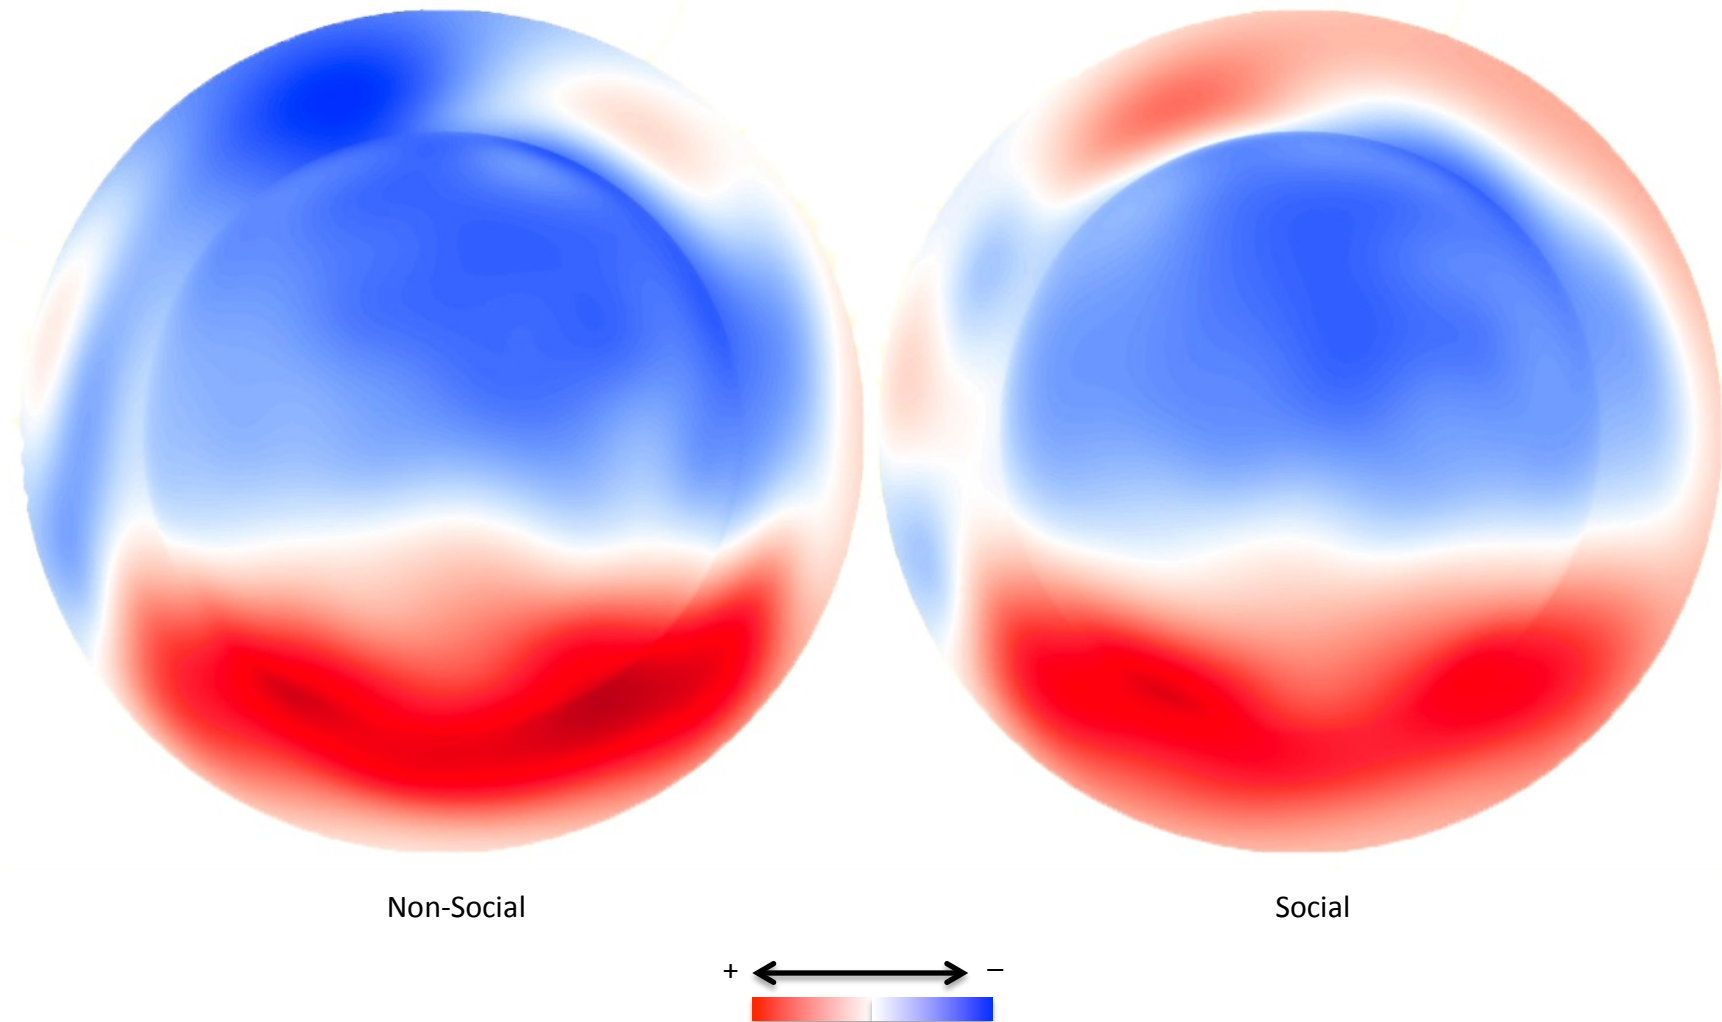

Topographic maps of the distribution of the positive (red) and negative (blue) voltages, calculated on the basis of across-subject averages, for ERP activity during the window selected for Nc Mean Amplitude. Maps are shown for ERPs elicited by Non-Social and Social stimuli. The segment identified shows a more negative Nc mean amplitude for Non-Social stimuli than for Social stimuli. This effect was lateralized in left-frontal regions.
