# Supplementary material
Source: PubMed Central journal article supplement (PMC4879106)

# Supplemental Figure 1. Stimuli Presented During Exposure Phase

Toy Set A

1

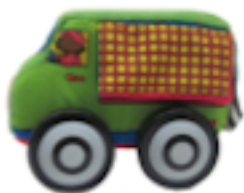

3

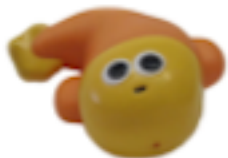

5

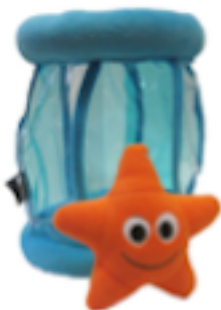

7

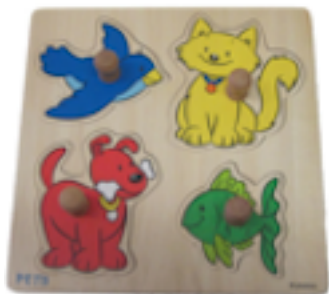

Toy Set B

2

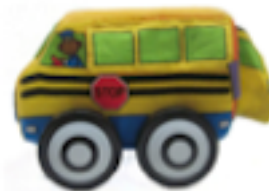

4

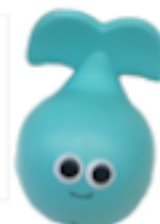

6

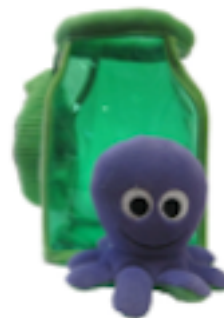

8

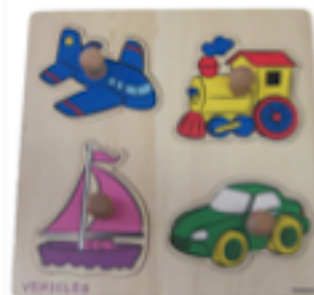

Supplement: NIHMS782757-supplement-Supp_1.pdf [file NIHMS782757-supplement-Supp_1.pdf]
